# Supplementary material for: Dual-targeted fluorescent probe for tracking polarity and phase transition processes during lipophagy
Source: Royal Society of Chemistry journal article supplement (doi:10.1039/d4mh00190g), 2024-01-01

All raw WB data: **Fig. 4g (Control-EBSS-CQ)**

GAPDH

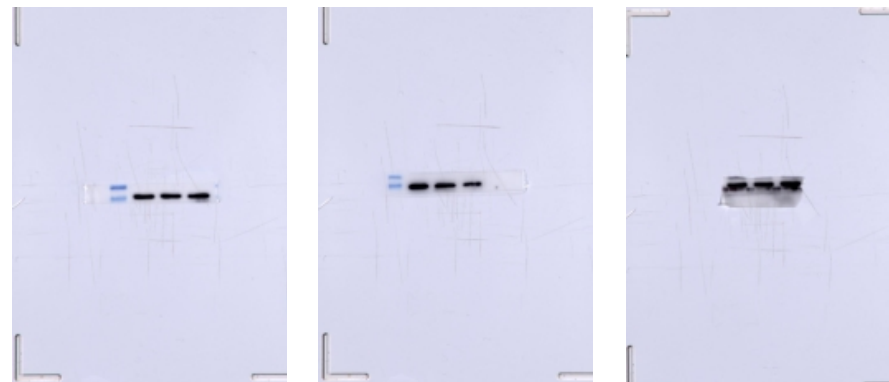

LC3B

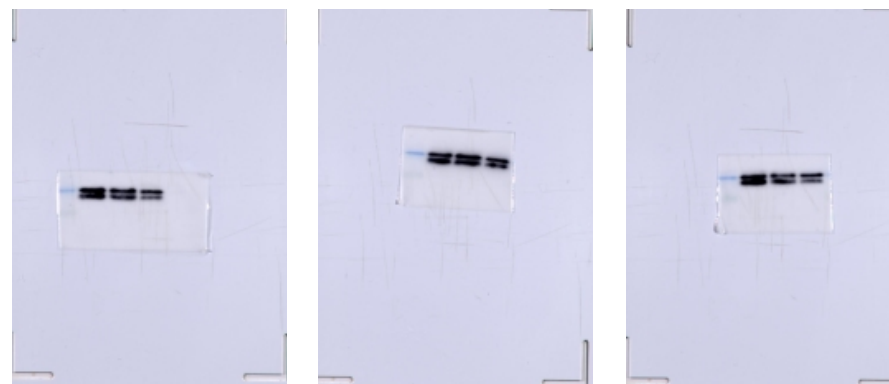

SQSTM1/p62

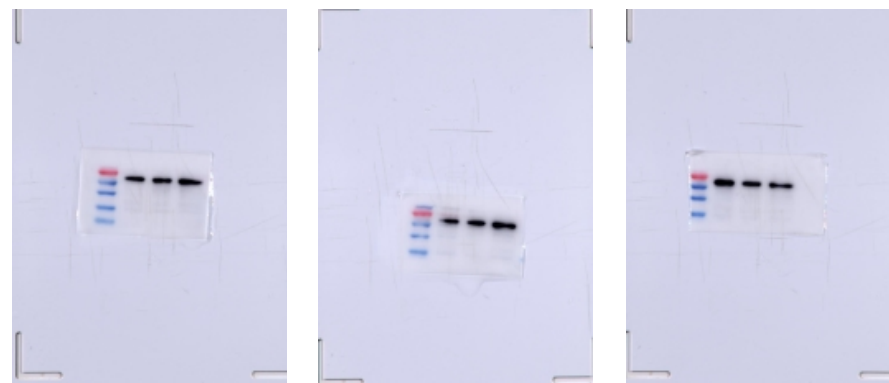

**Fig. 4g- GAPDH ①**

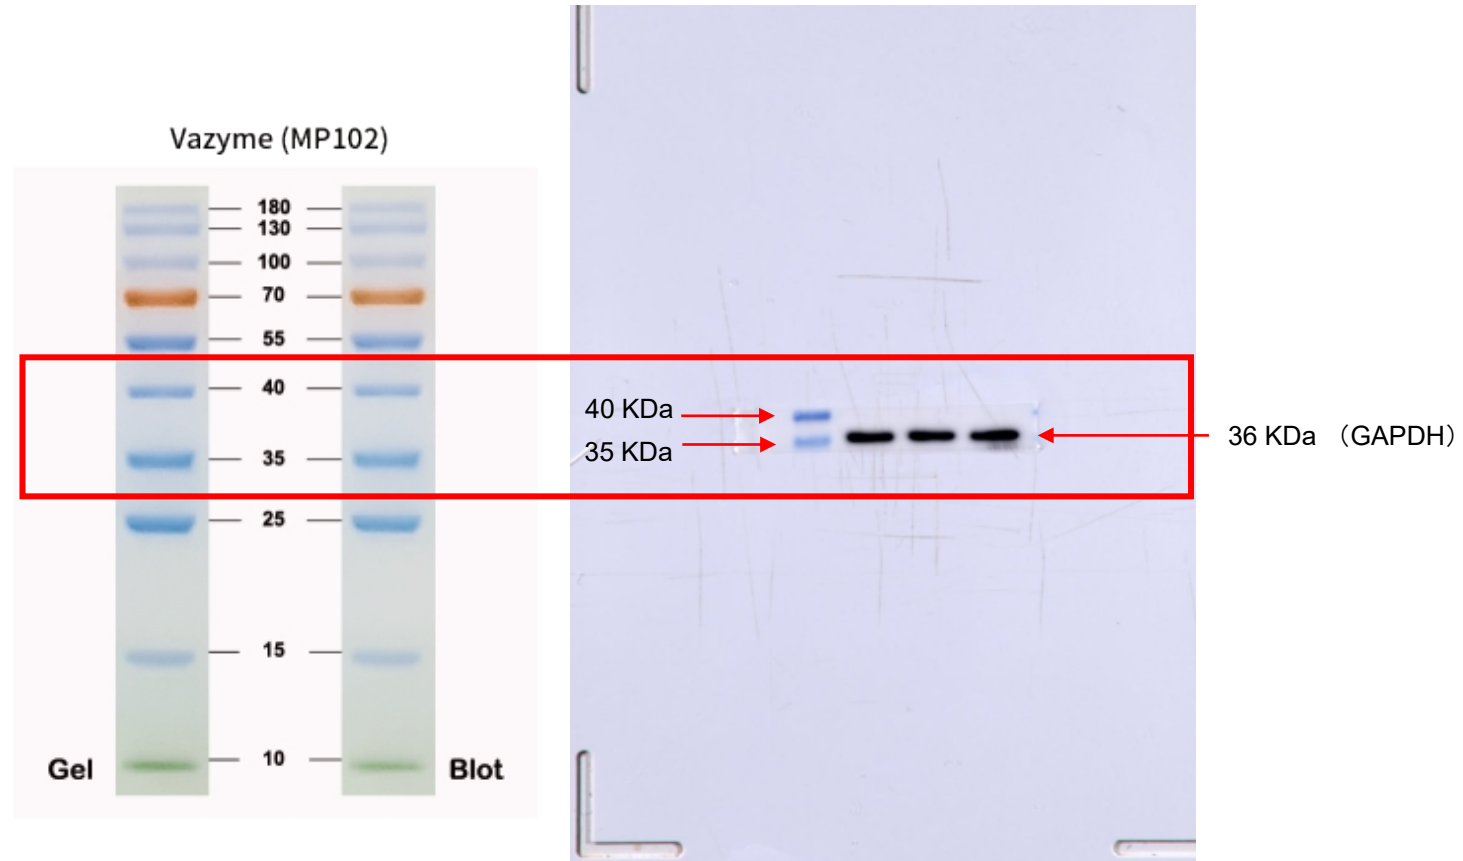

**Fig. 4g- GAPDH ②**

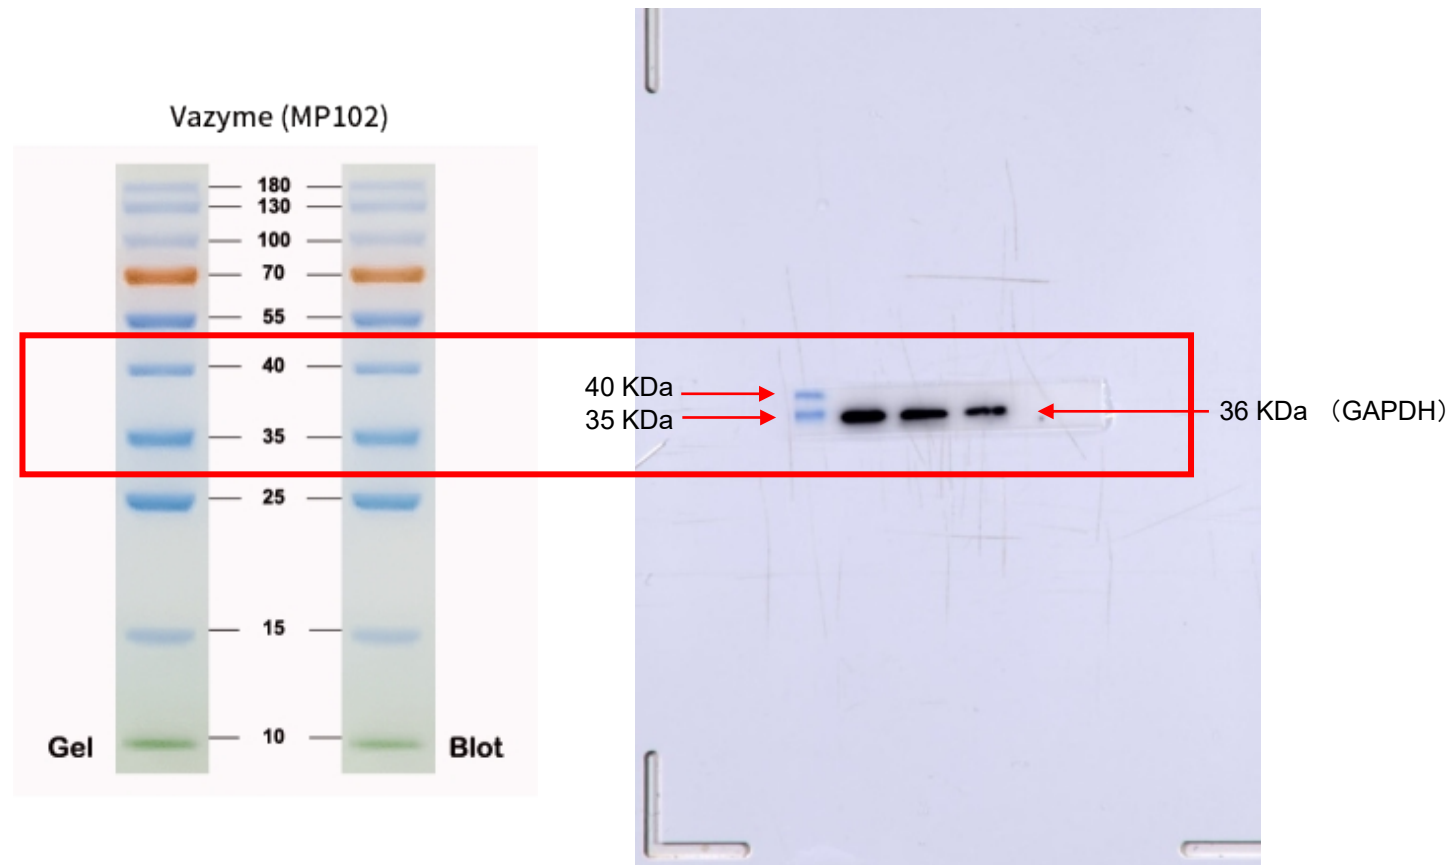

**Fig. 4g- GAPDH ③**

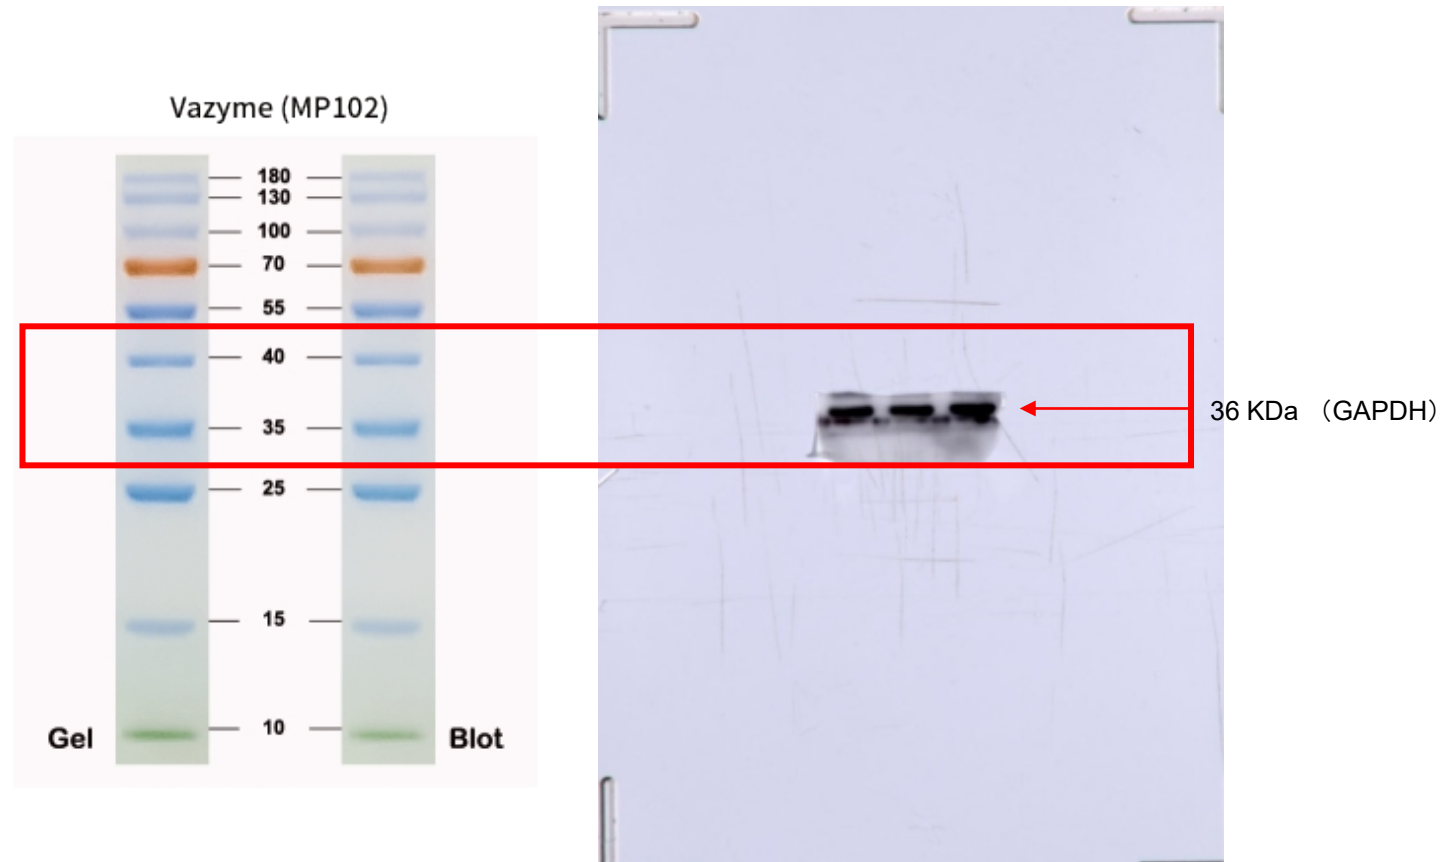

Fig. 4g- LC3B ①

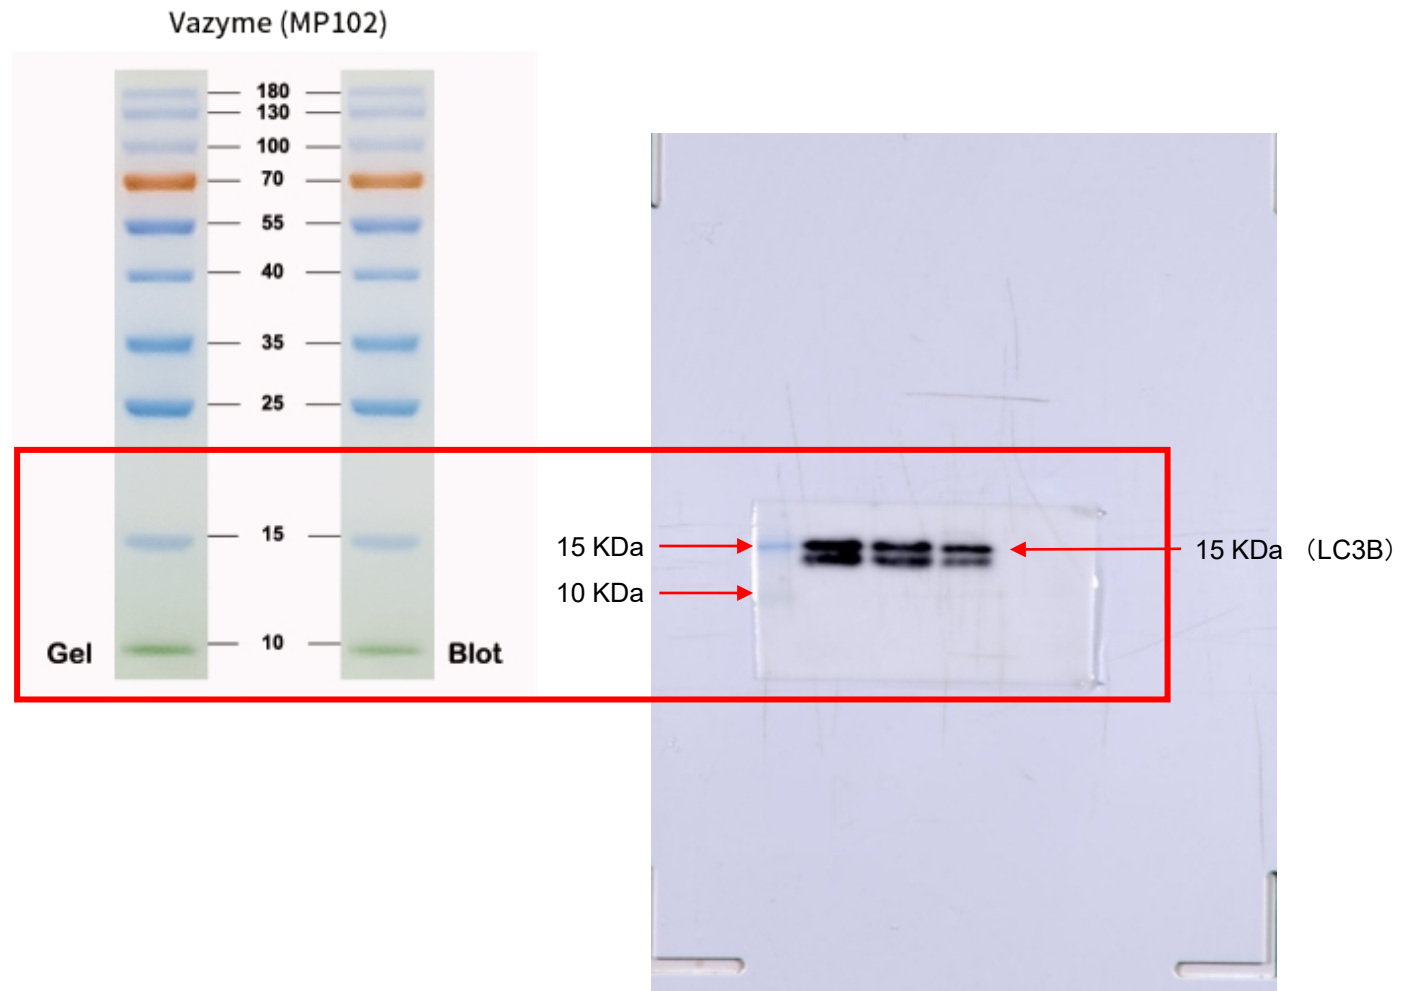

Fig. 4g- LC3B ②

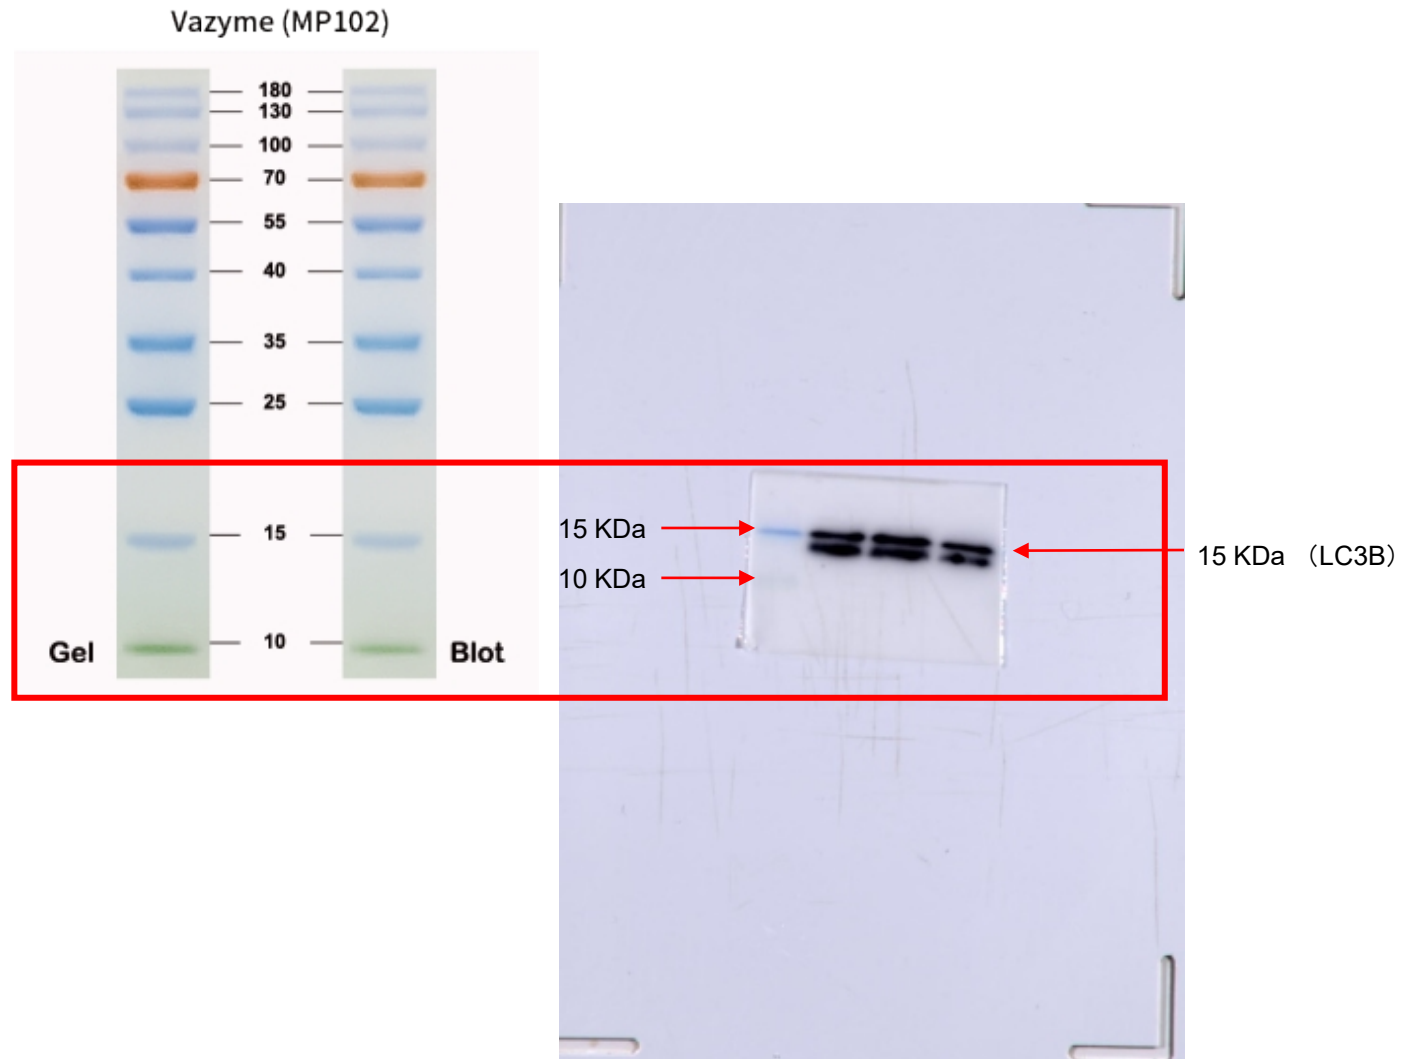

**Fig. 4g- LC3B ③**

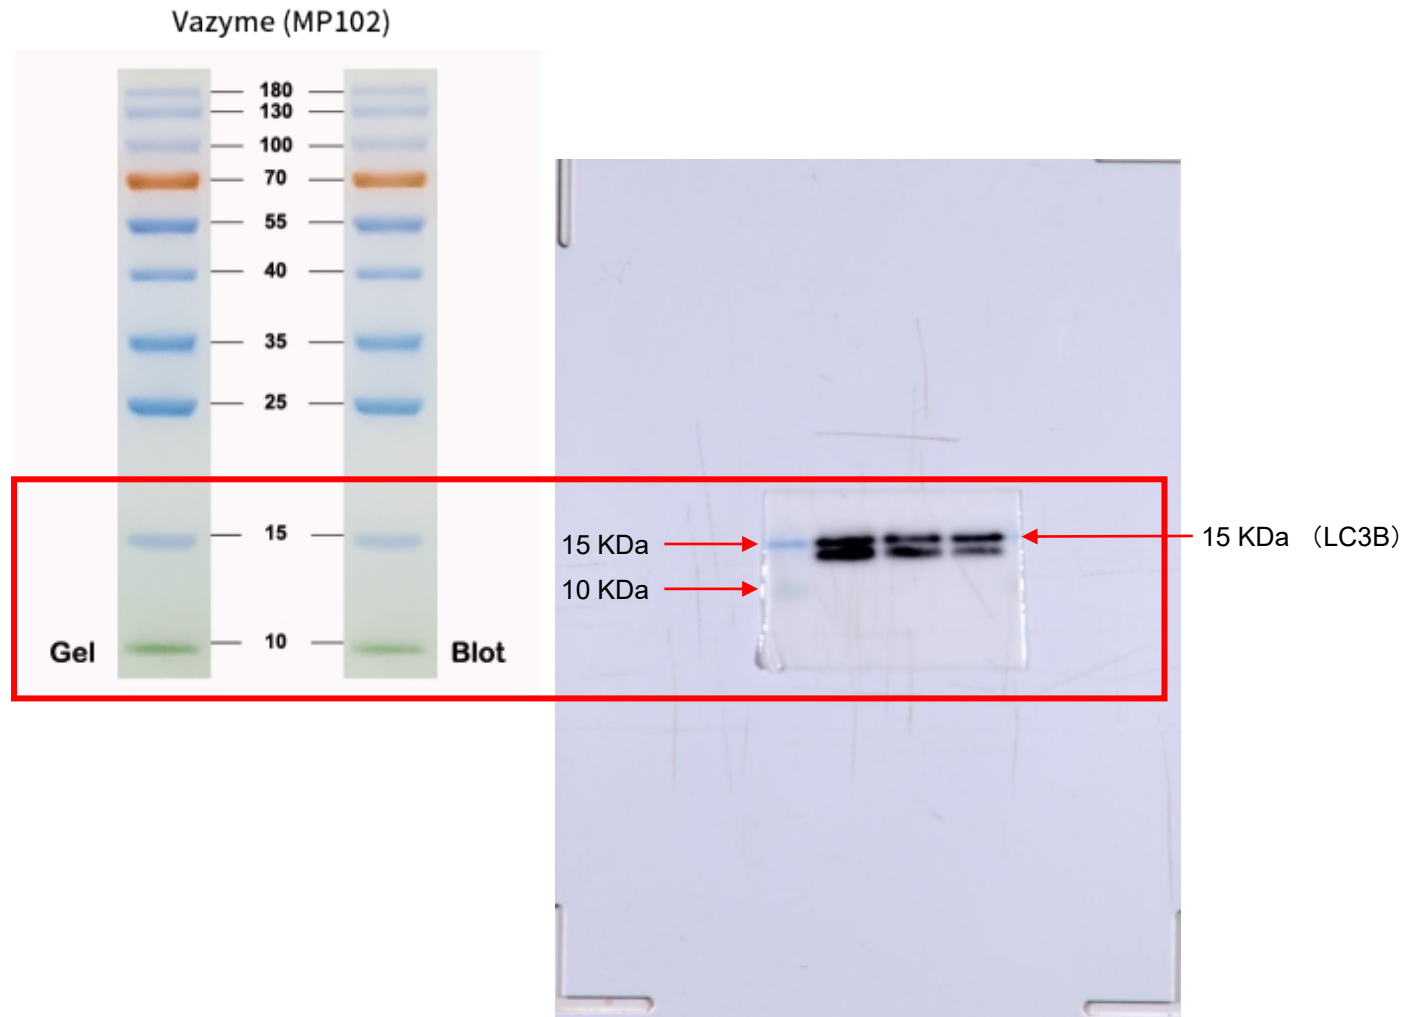

Fig. 4g- SQSTM1/p62 ①

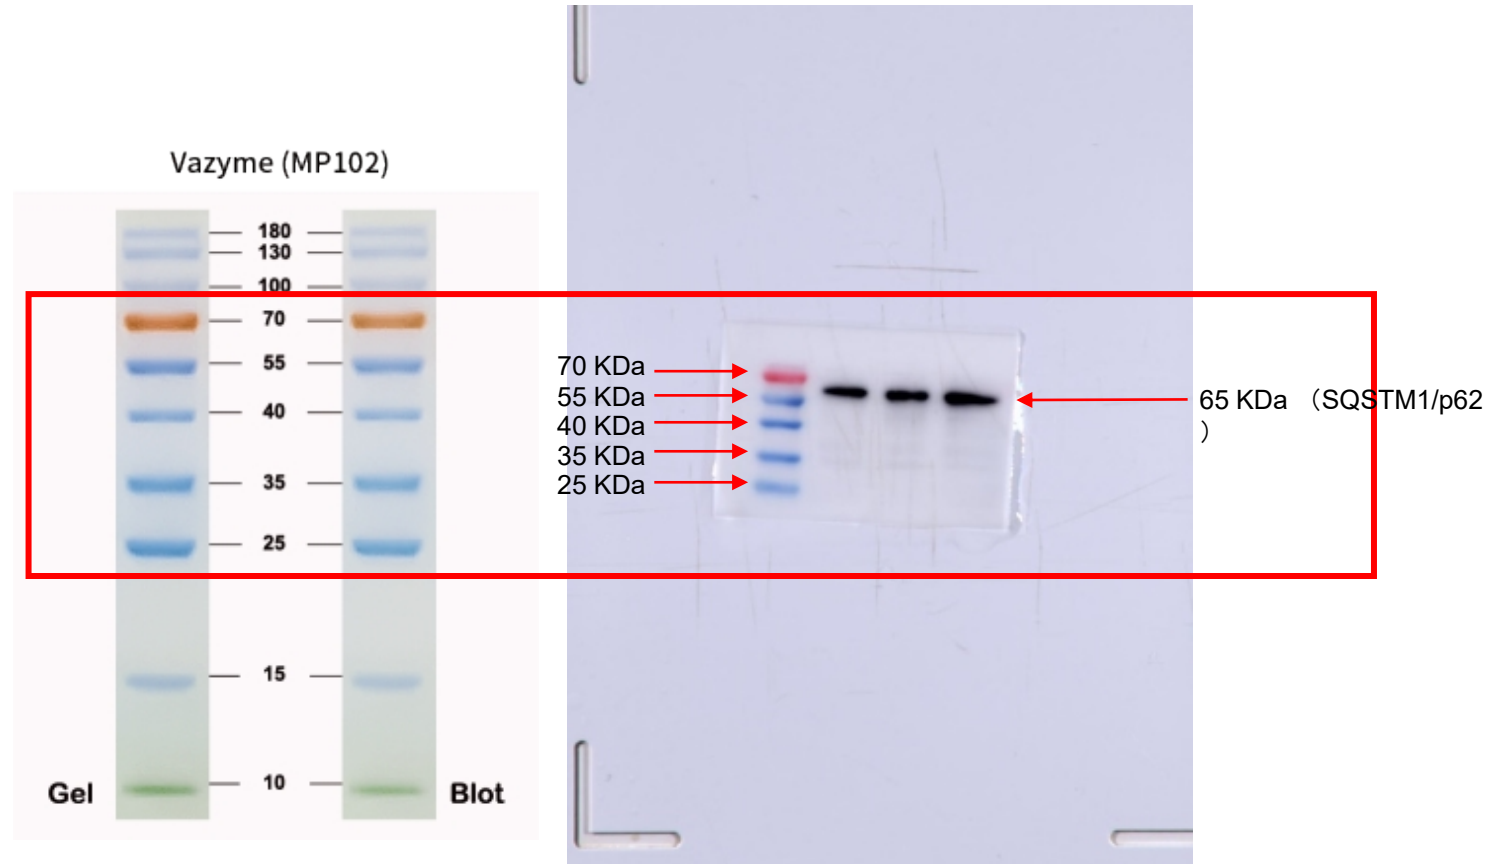



Fig. 4g- SQSTM1/p62 ②

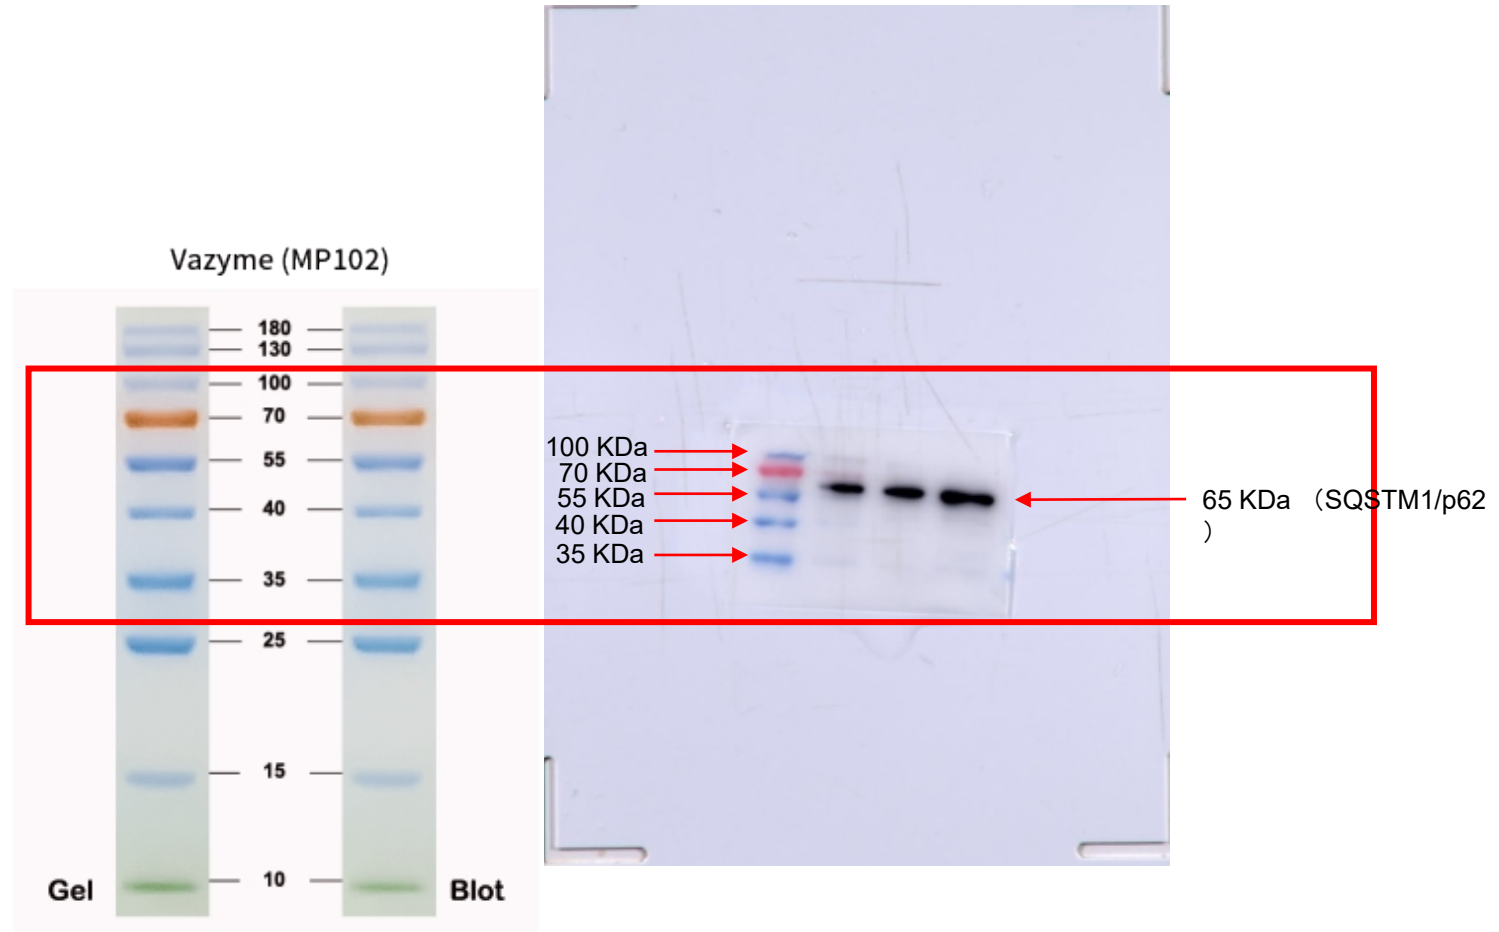

Fig. 4g- SQSTM1/p62 ③

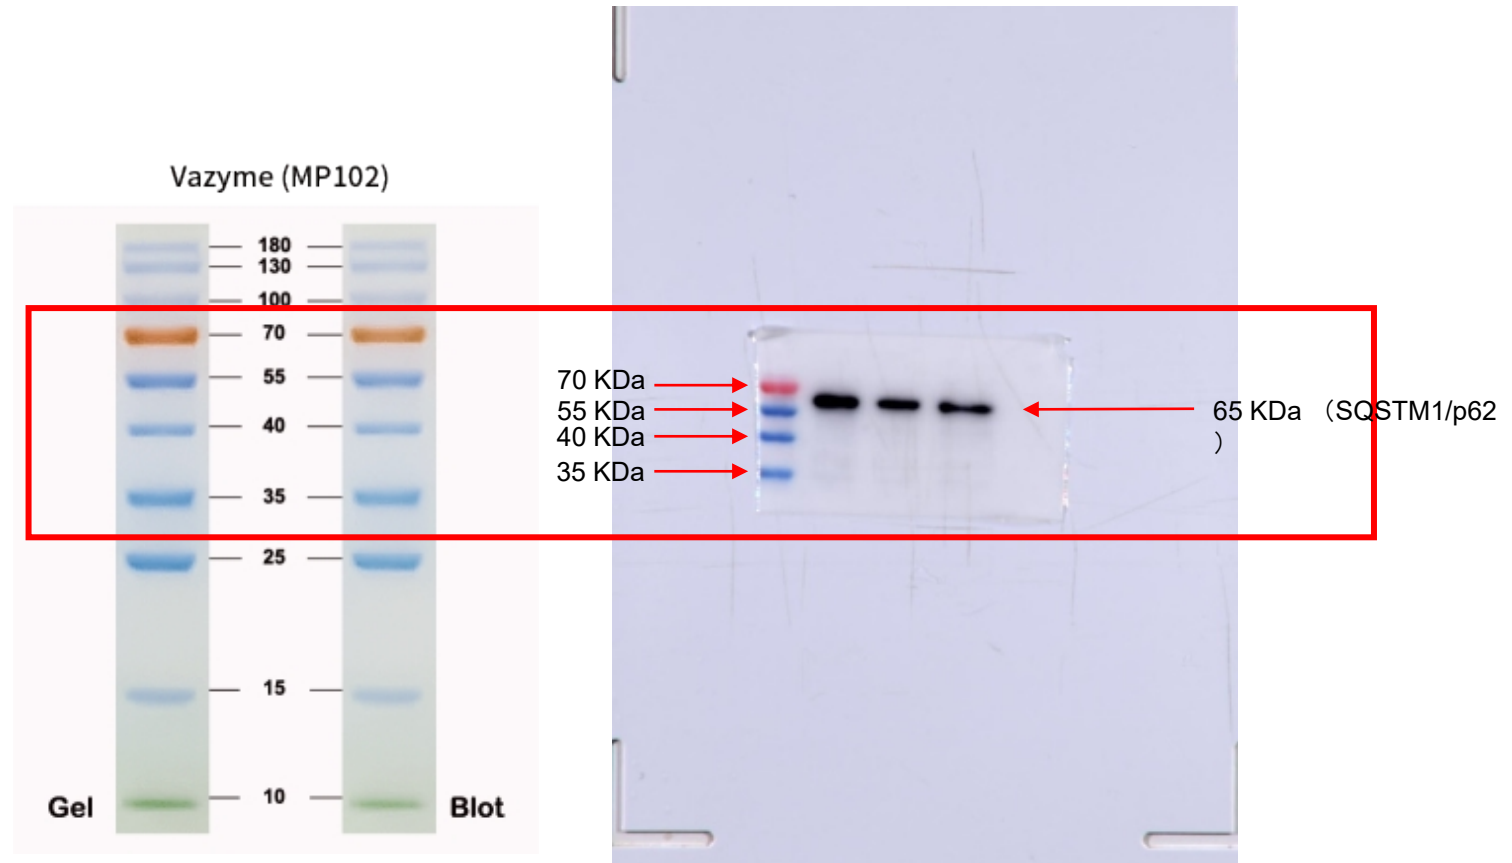

All raw WB data: **Fig. 4h (Control-Verapamil-Loperamide)**

GAPDH

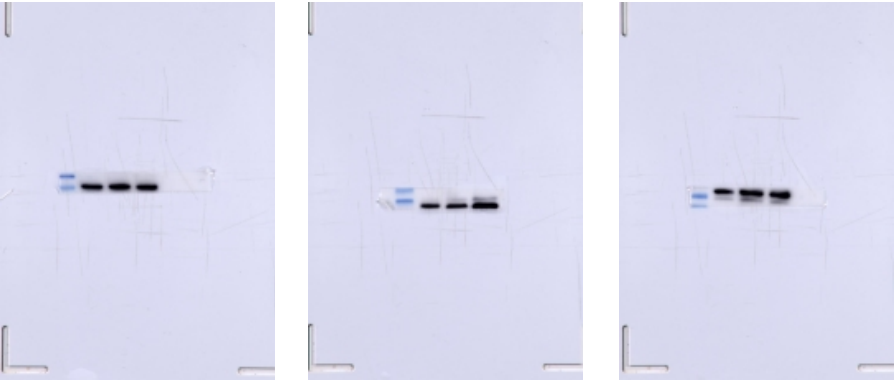

LC3B

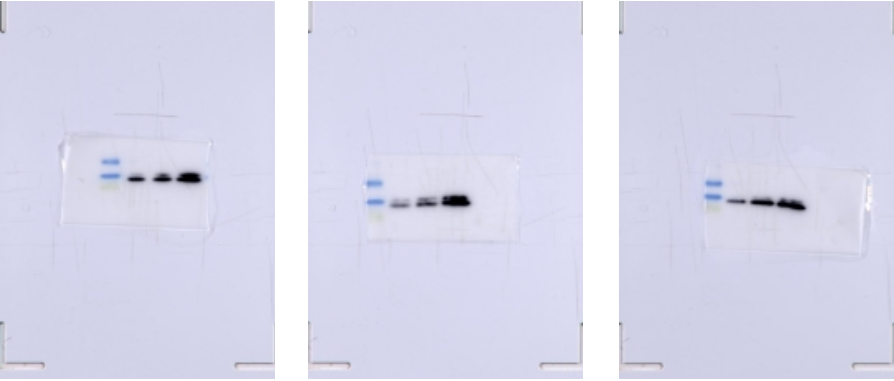

SQSTM1/p62

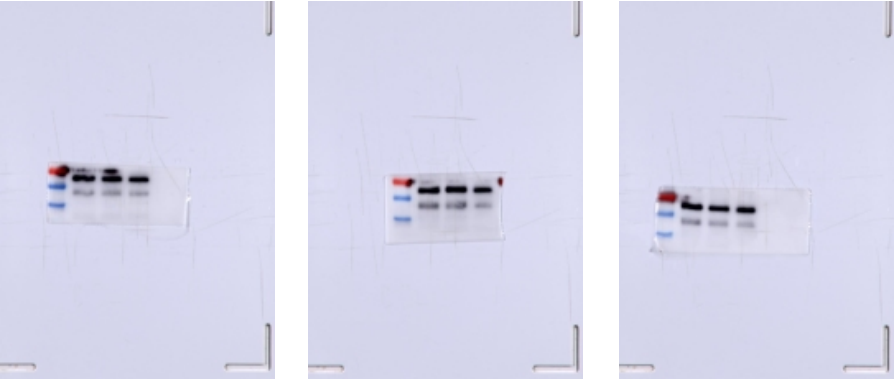

Fig. 4h- GAPDH ①

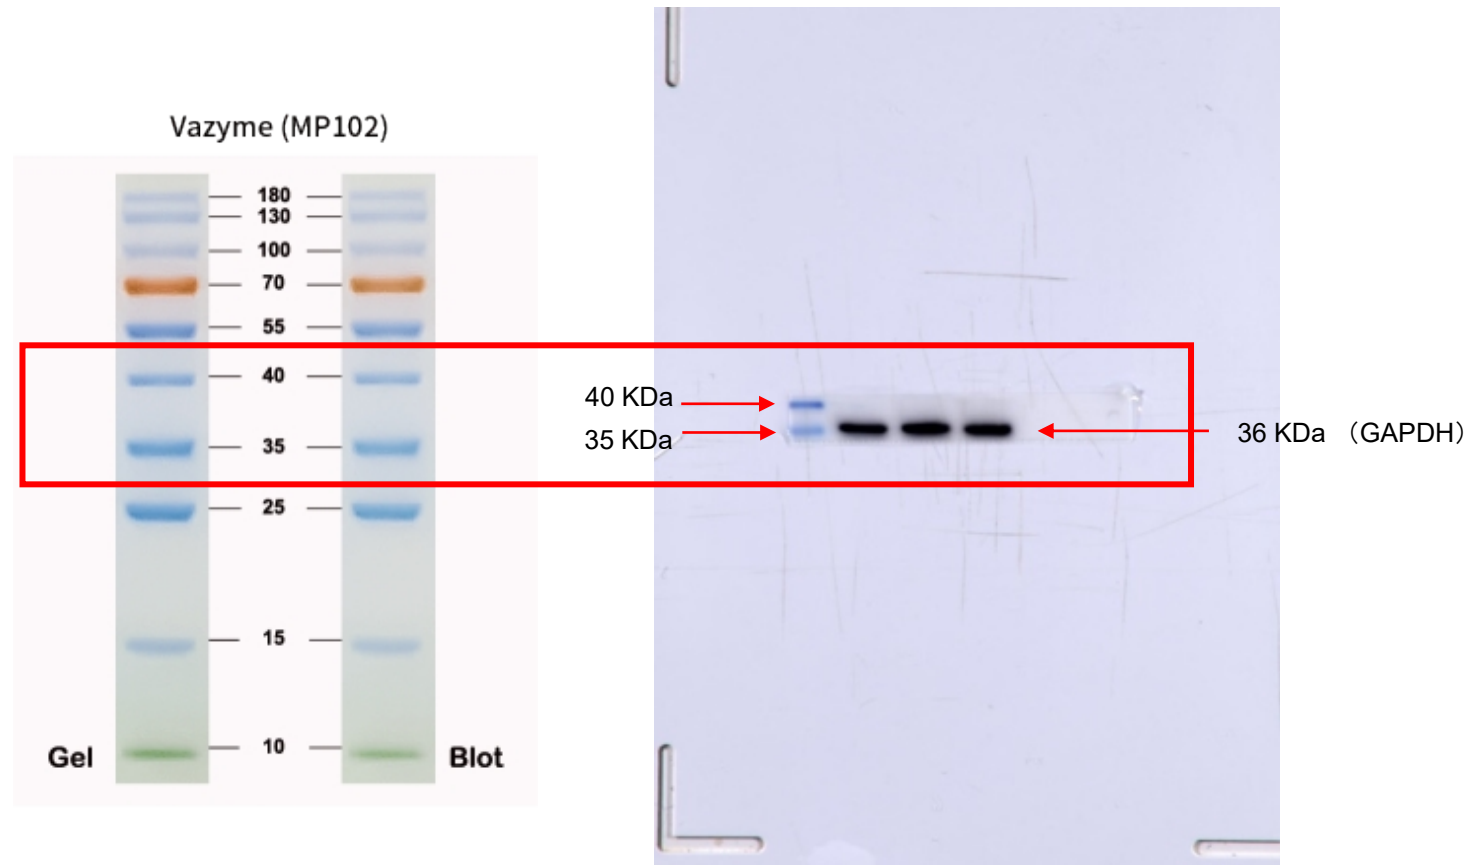

Fig. 4h- GAPDH ②

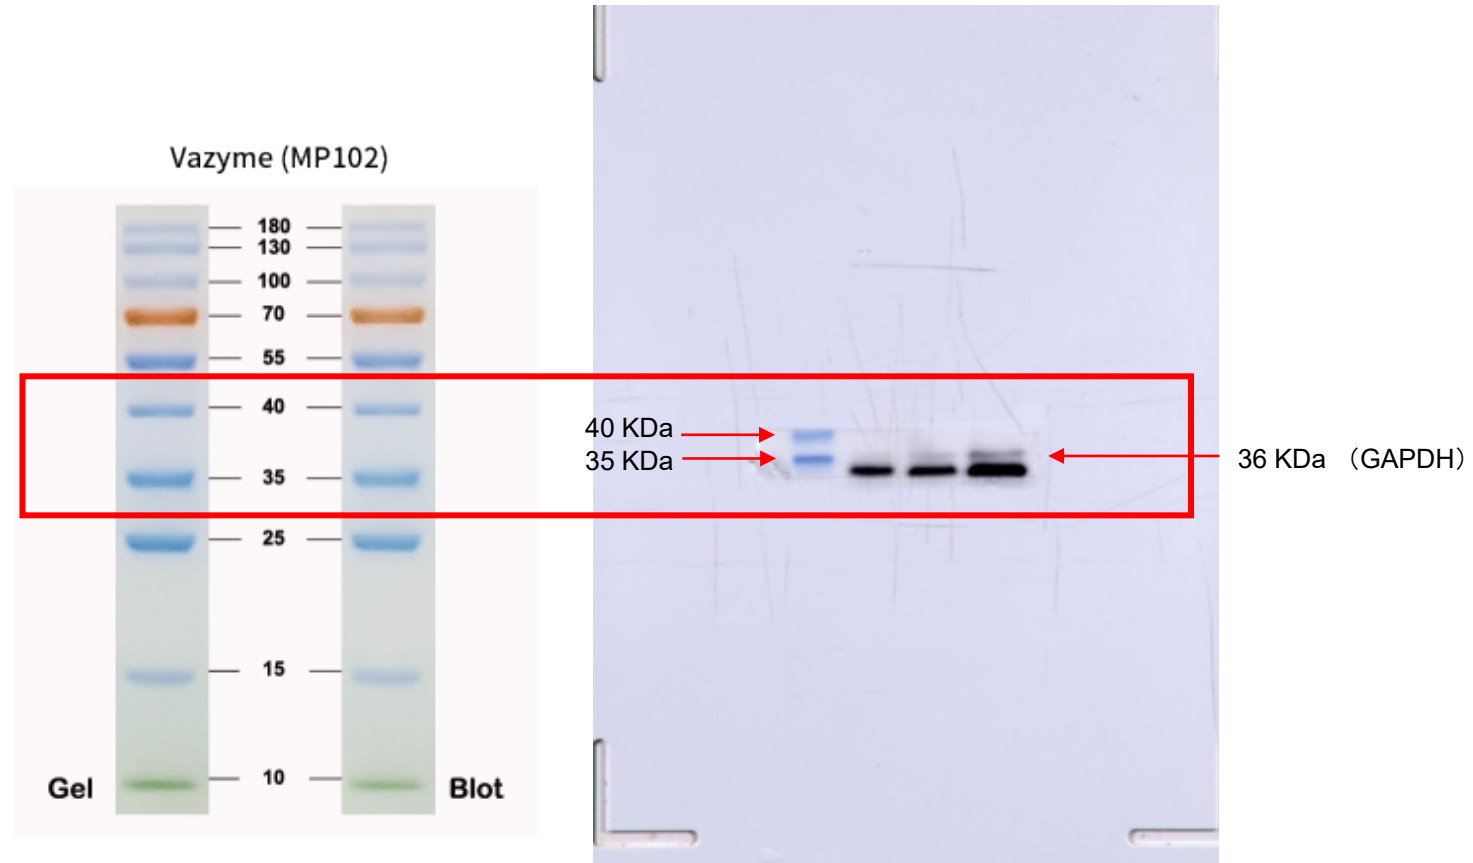

Fig. 4h- GAPDH ③

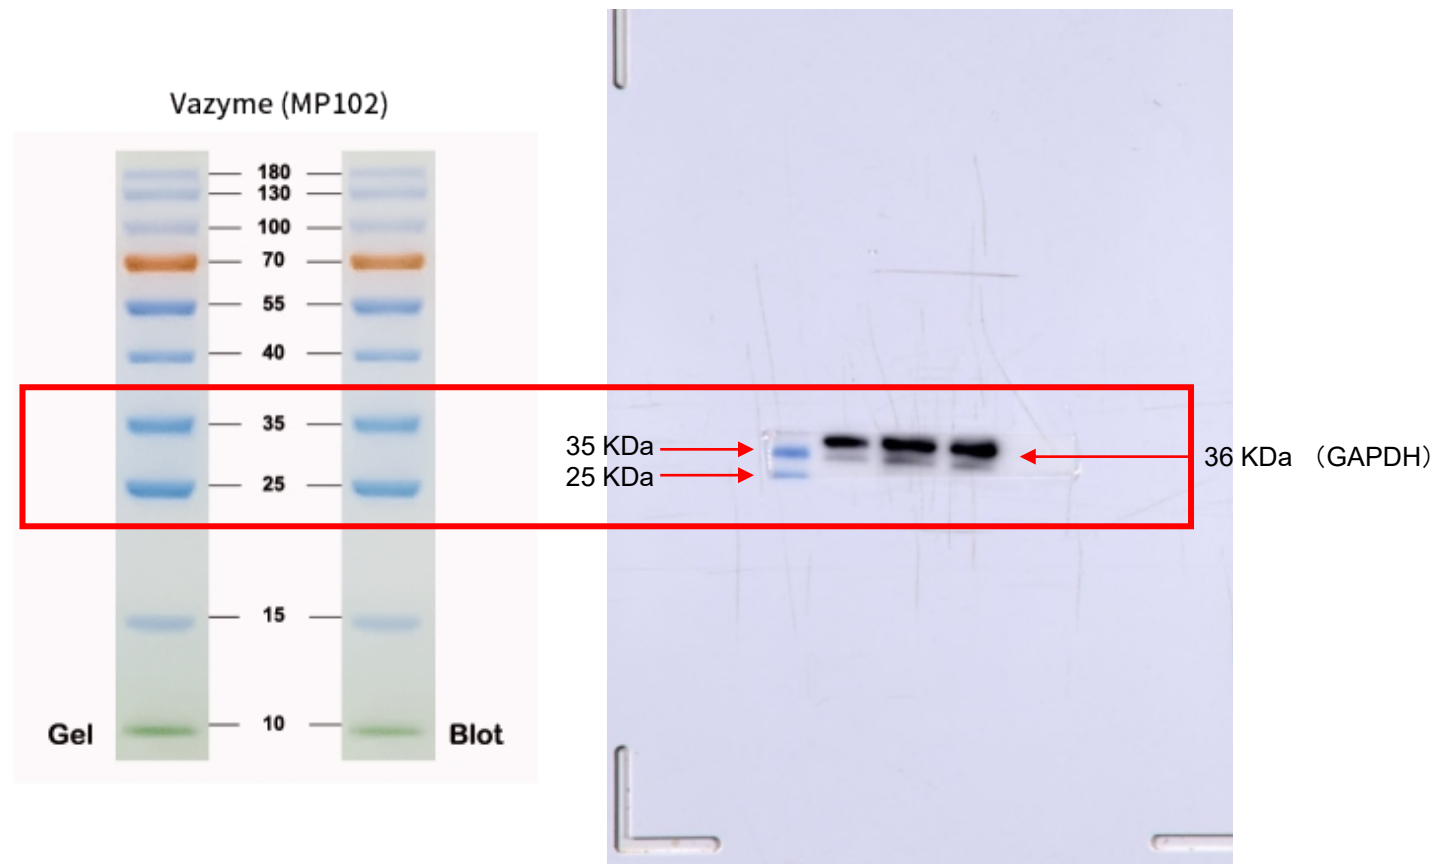

Fig. 4h- LC3B ①

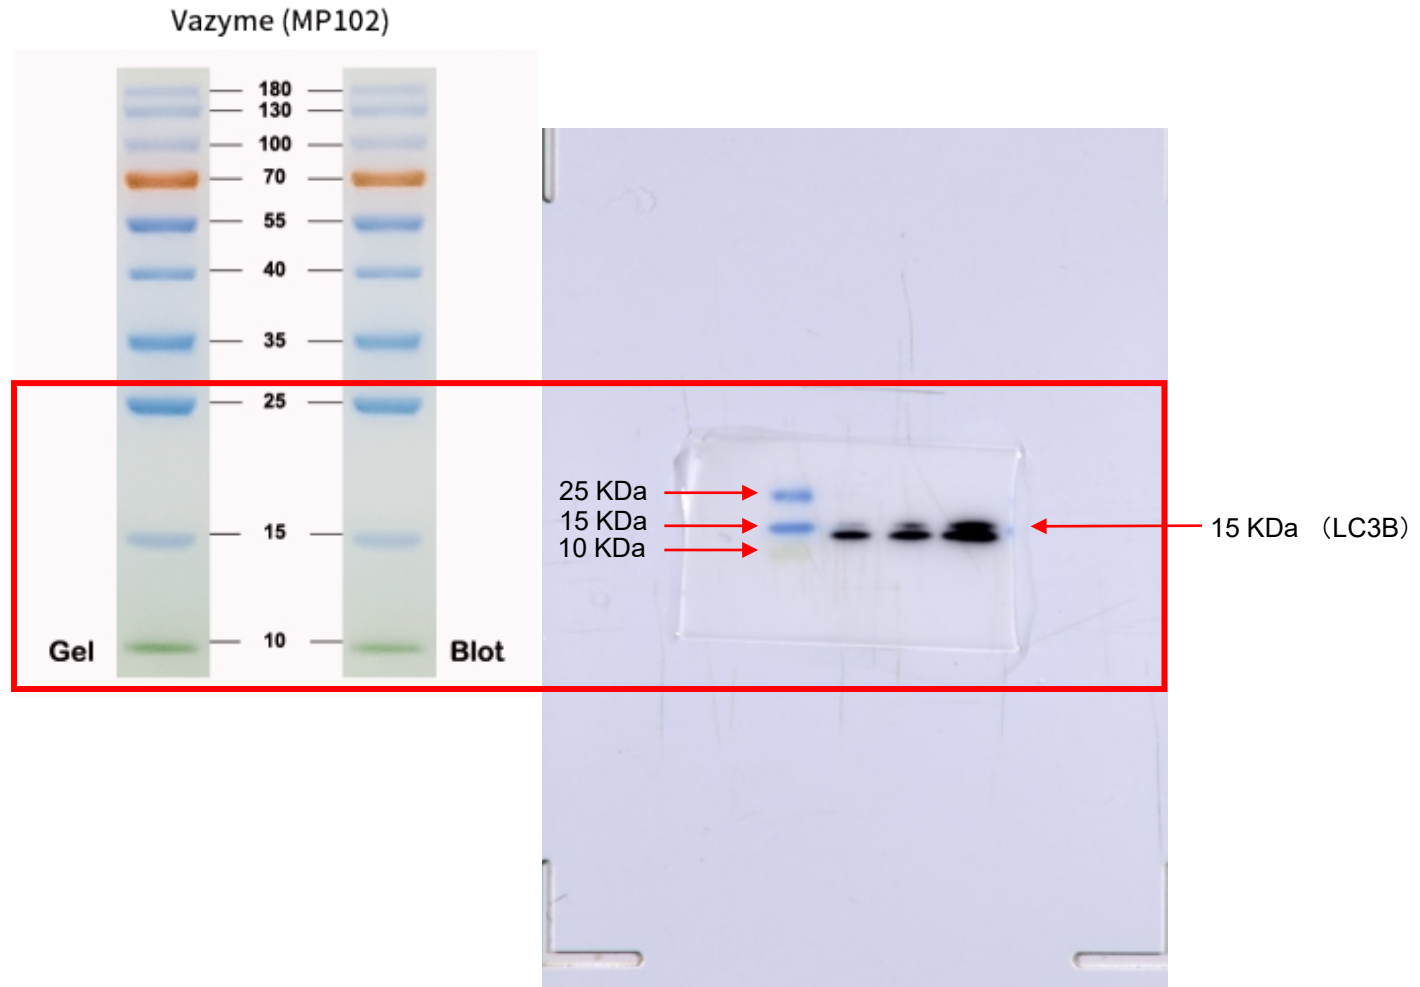

Fig. 4h- LC3B ②

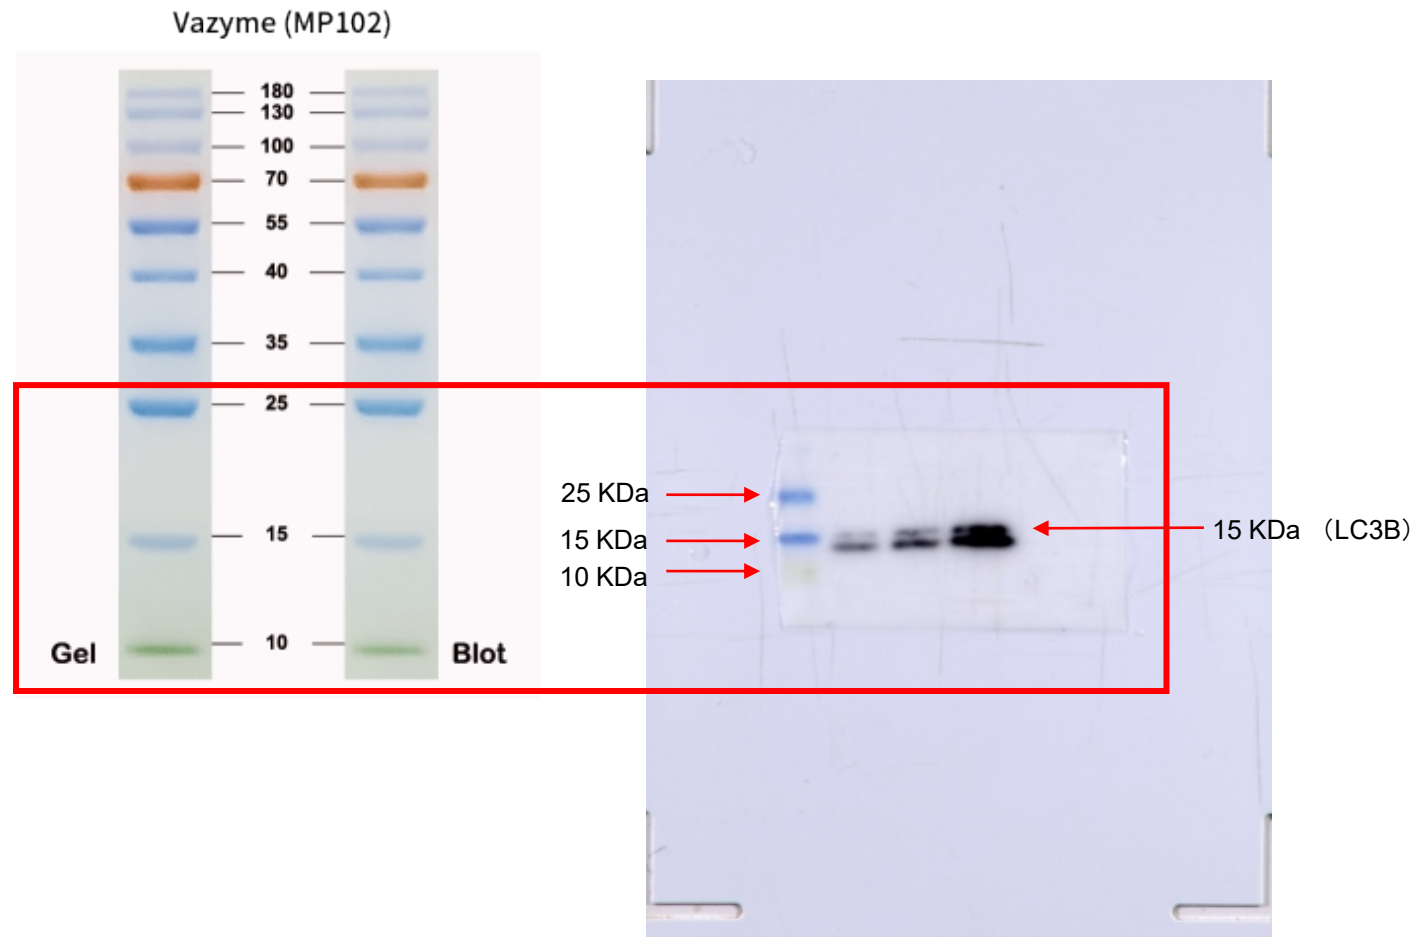



Fig. 4h- LC3B ③

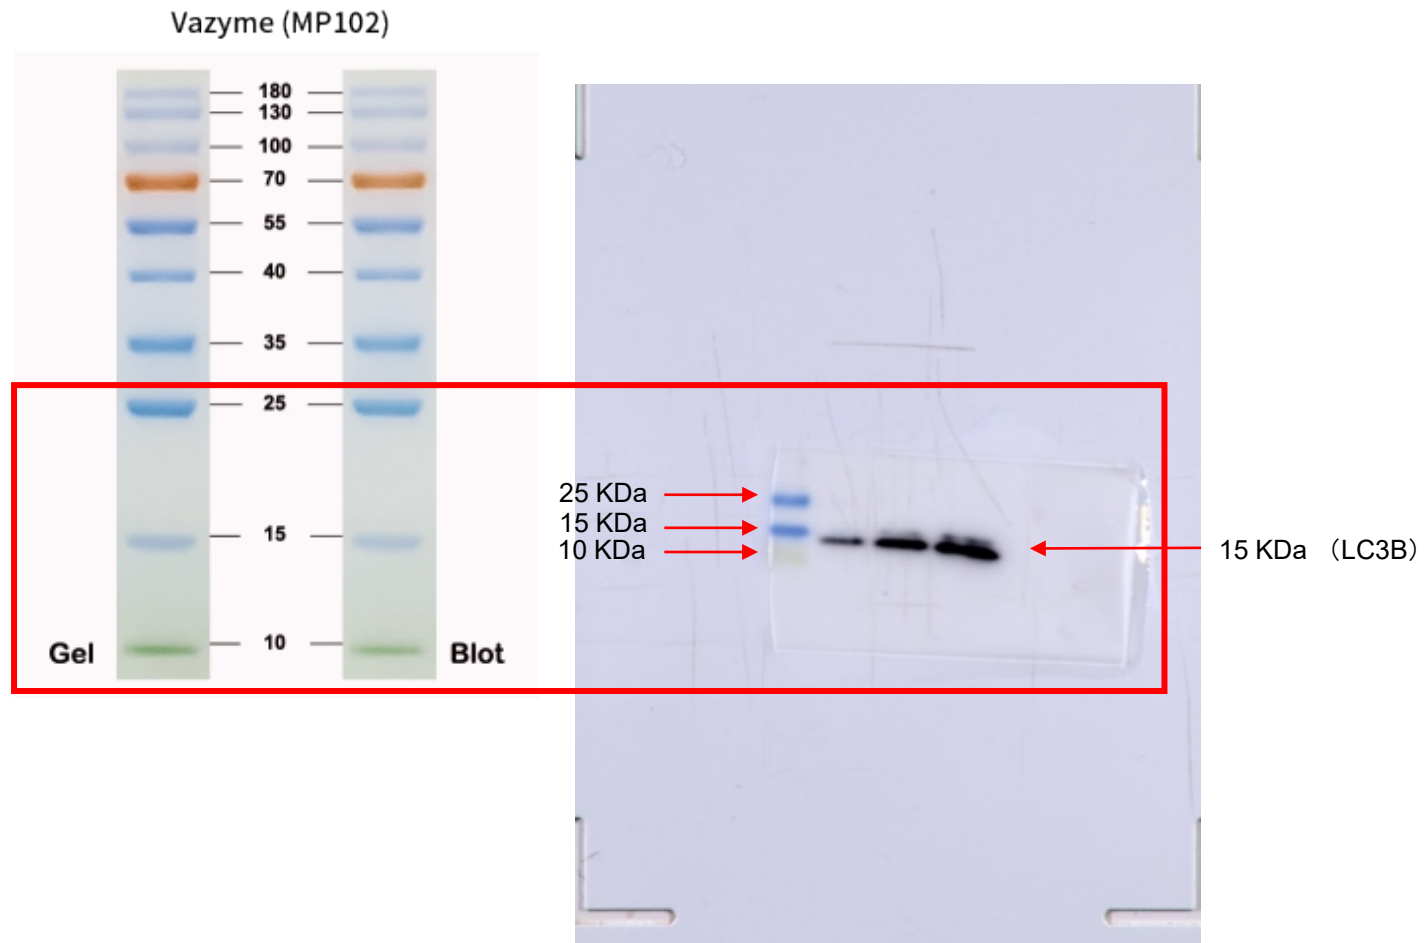

Fig. 4h- SQSTM1/p62 ①

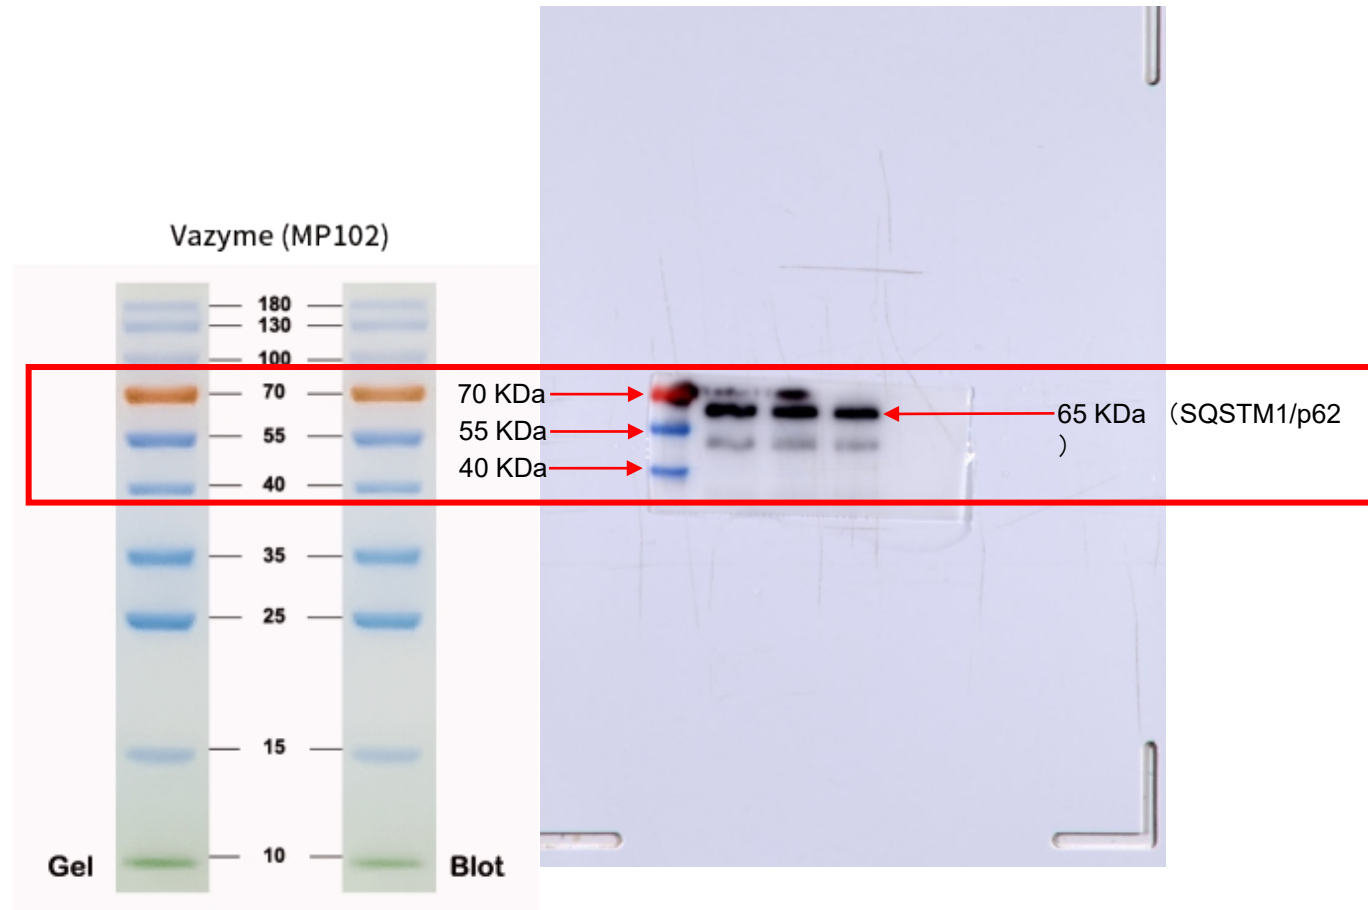

Fig. 4h- SQSTM1/p62 ②

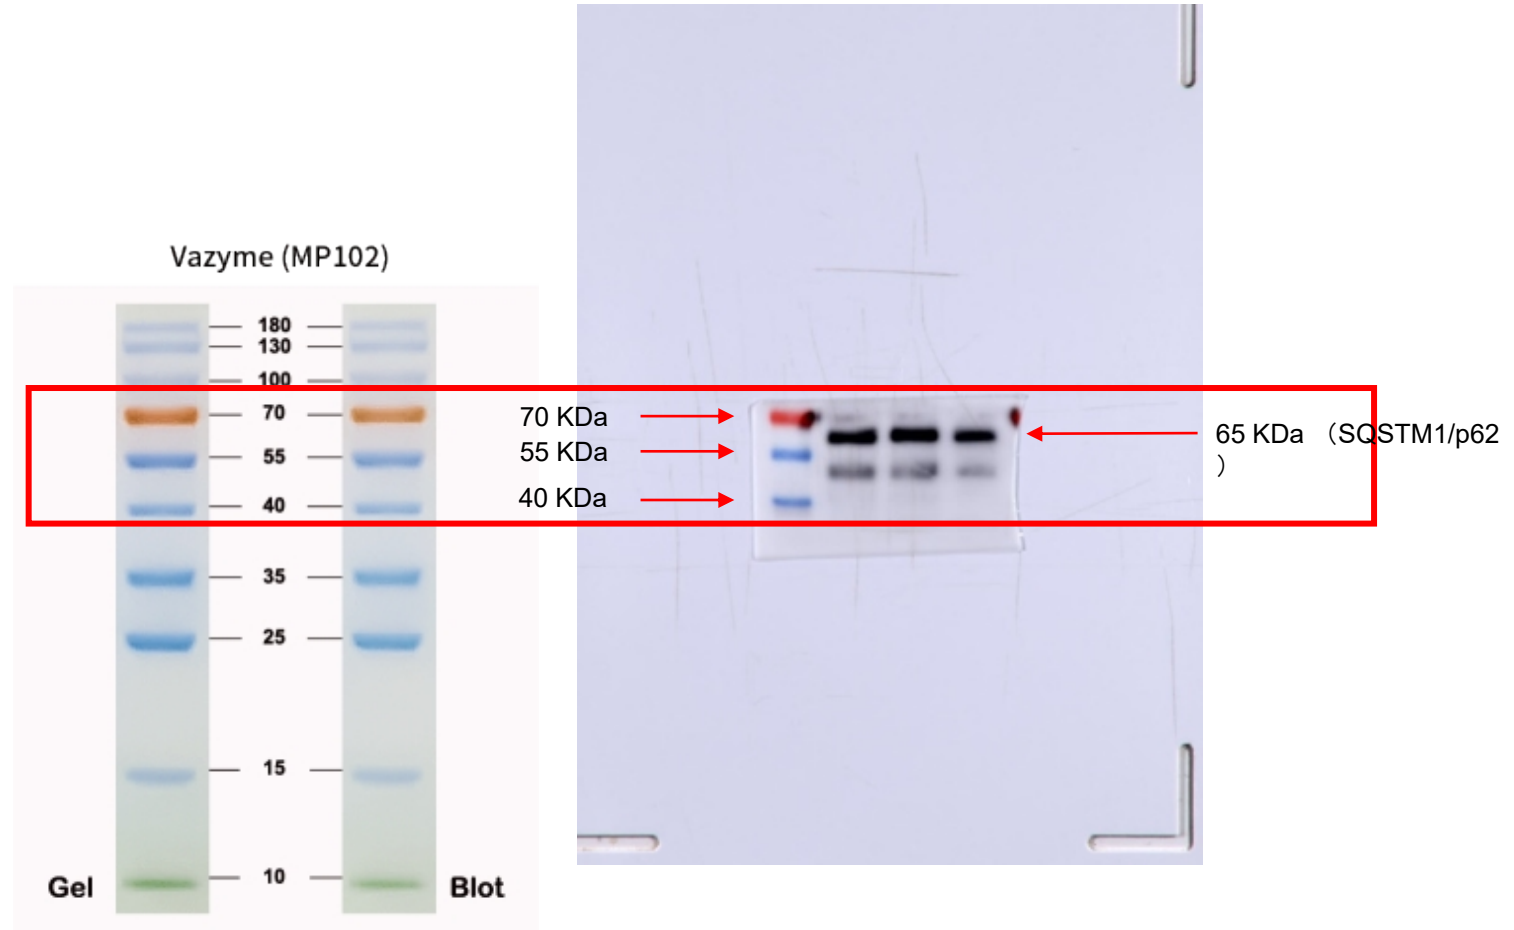

Fig. 4h- SQSTM1/p62 ③

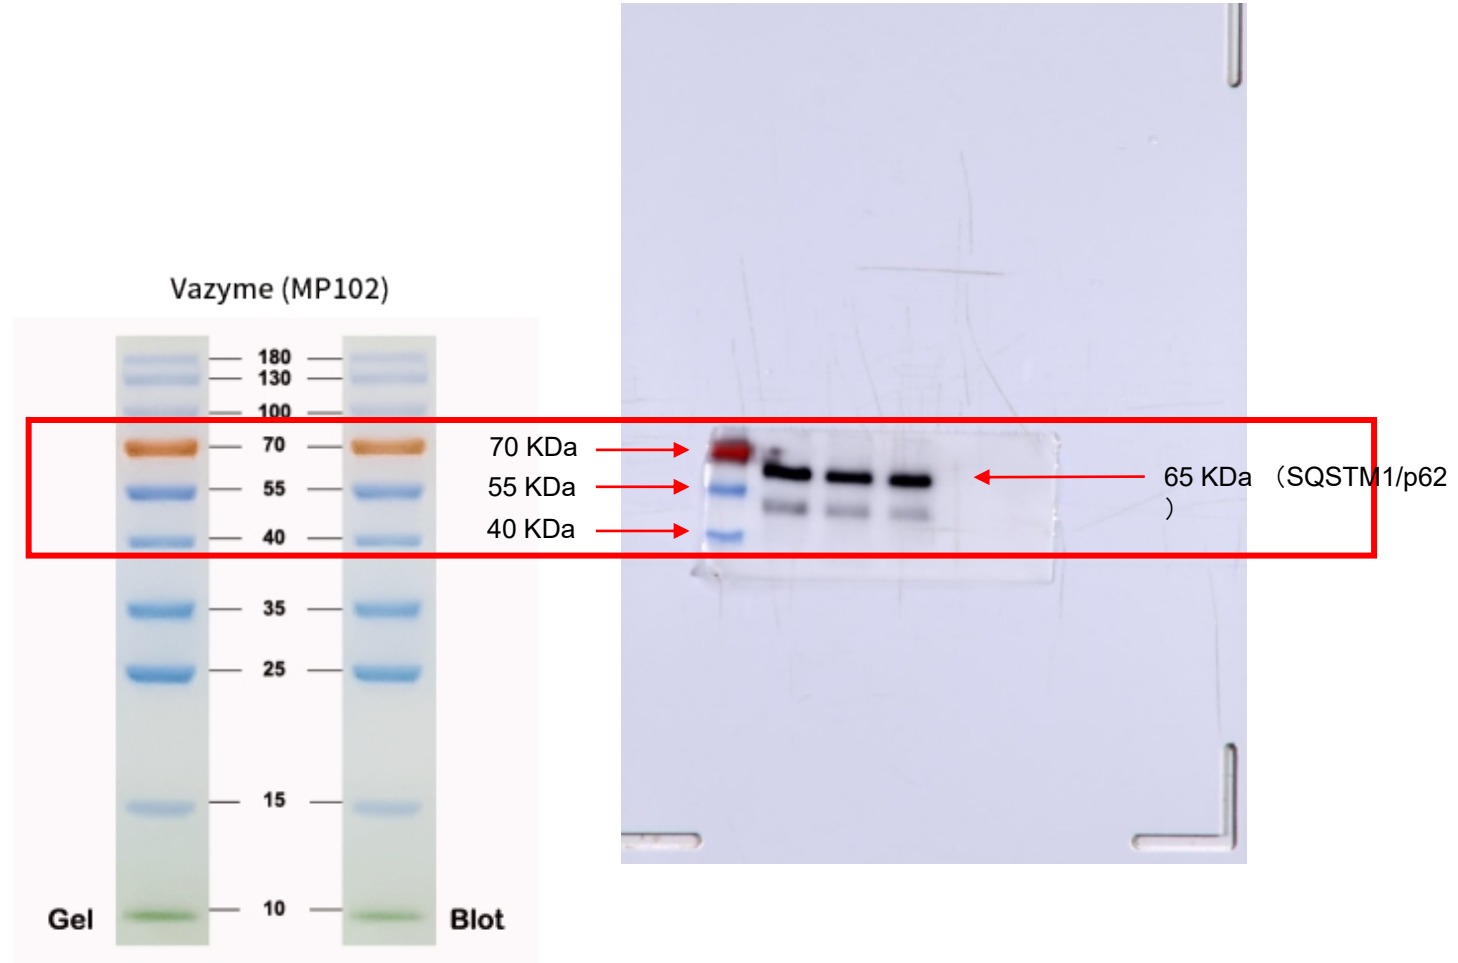

Supplement: d4mh00190g2.pdf [file d4mh00190g2.pdf]
